# Supplementary material for: Trophoblast cell surface antigen-2 phosphorylation triggered by binding of galectin-3 drives metastasis through down-regulation of E-cadherin
Source: PubMed Central journal article supplement (PMC10392139; doi:10.1016/j.jbc.2023.104971), 2023-06-27

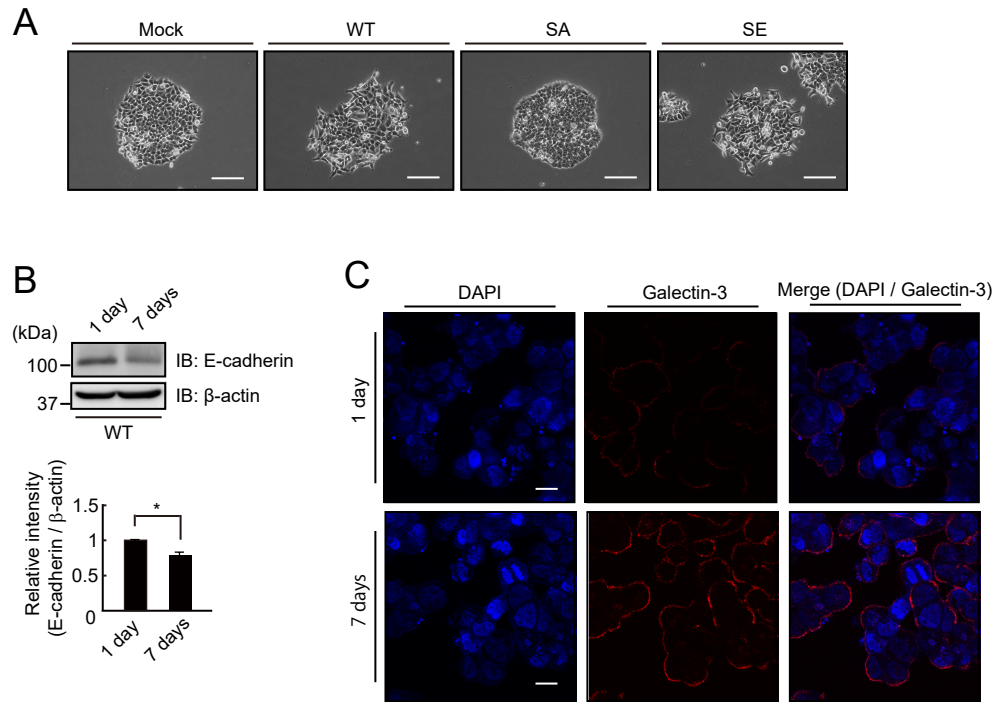

Supplement: mmc5.pdf [file mmc5.pdf]
